# 1                                    **Internal noise in contrast discrimination** 2                                    **propagates forwards from early visual cortex**

3  
4  
5  
6    Greta Vilidaite<sup>1,2</sup>, Emma Marsh<sup>1</sup> & Daniel H. Baker<sup>1,3</sup>

7            1. Department of Psychology, University of York, York, UK

8            2. Department of Psychology, Stanford University, California, USA

9            3. York Biomedical Research Institute, University of York, York, UK

10  
11    **Corresponding author:** Daniel H Baker, email: [daniel.baker@york.ac.uk](mailto:daniel.baker@york.ac.uk)

## 12 13 14    **Abstract**

15  
16    Human contrast discrimination performance is limited by transduction nonlinearities and  
17    variability of the neural representation (noise). Whereas the nonlinearities have been well-  
18    characterised, there is less agreement about the specifics of internal noise. Psychophysical  
19    models assume that it impacts late in sensory processing, whereas neuroimaging and  
20    intracranial electrophysiology studies suggest that the noise is much earlier. We  
21    investigated whether perceptually-relevant internal noise arises in early visual areas or later  
22    decision making areas. We recorded EEG and MEG during a two-interval-forced-choice  
23    contrast discrimination task and used multivariate pattern analysis to decode target/non-  
24    target and selected/non-selected intervals from evoked responses. We found that  
25    perceptual decisions could be decoded from both EEG and MEG signals, even when the  
26    stimuli in both intervals were physically identical. Above-chance decision classification  
27    started <100ms after stimulus onset, suggesting that neural noise affects sensory signals  
28    early in the visual pathway. Classification accuracy increased over time, peaking at >500ms.  
29    Applying multivariate analysis to separate anatomically-defined brain regions in MEG source  
30    space, we found that occipital regions were informative early on but then information  
31    spreads forwards across parietal and frontal regions. This is consistent with neural noise  
32    affecting sensory processing at multiple stages of perceptual decision making. We suggest  
33    how early sensory noise might be resolved with Birdsall's linearisation, in which a dominant  
34    noise source obscures subsequent nonlinearities, to allow the visual system to preserve the  
35    wide dynamic range of early areas whilst still benefitting from contrast-invariance at later  
36    stages. A preprint of this work is available at: <http://dx.doi.org/10.1101/364612>

37  
38    *Keywords:* contrast discrimination; EEG; MEG; source space; pattern classification; internal  
39    noise

40  
41

## 42 1 Introduction

43

44 The ability to make comparisons between sensory stimuli of different intensities has  
45 profound survival value for most organisms. Animals might benefit from choosing the ripest  
46 fruit based on colour, swimming towards the warmest patch of ocean, or selecting the mate  
47 with the loudest roar. Understanding the features of the central nervous system that limit  
48 such sensory discriminations has been a focus of research in many areas of psychology and  
49 neuroscience, from early work in humans (c.f. Weber's law, Fechner, 1912), and  
50 experiments with model organisms (Busse et al., 2011; Hecht & Wald, 1934) to studies using  
51 contemporary neuroimaging techniques (Boynton, Demb, Glover, & Heeger, 1999).

52

53 A widely studied perceptual task is the ability to discriminate between visual stimuli of  
54 different contrasts. Human contrast discrimination performance is constrained by the  
55 nonlinearity that maps physical contrast to neural response, and the intrinsic variability of  
56 the neural representation ('internal noise'). Psychophysical, neurophysiological and  
57 neuroimaging work have converged on a nonlinearity that is expansive at low contrasts and  
58 compressive at higher contrasts (Boynton et al., 1999; Busse, Wade, & Carandini, 2009;  
59 Legge & Foley, 1980). However, there is substantially less agreement regarding the details of  
60 performance-limiting internal noise.

61

62 Most psychophysical models make the assumption that the dominant source of noise for  
63 contrast discrimination is additive (i.e. independent of signal strength) and impacts at a late  
64 stage of processing. The primary justification for this arrangement is the observation that a  
65 dominant source of noise occurring before a nonlinearity will neutralise the effects of that  
66 nonlinearity, rendering it invisible to inspection (termed Birdsall's theorem; Klein & Levi,  
67 2009; Smith & Swift, 1985). Since contrast transduction is observably nonlinear (Boynton et  
68 al., 1999; Busse et al., 2009; Legge & Foley, 1980), any early sources of noise must be  
69 negligible in comparison to the magnitude of late additive noise.

70

71 On the other hand, most electrophysiological and neuroimaging studies have suggested that  
72 perceptually relevant noise is located in early sensory areas (Campbell & Kulikowski, 1972;  
73 Carandini, 2004; Roelfsema & Spekreijse, 2001). Ress and Heeger (2003) demonstrated the  
74 influence of early sensory noise by measuring fMRI blood-oxygen-level dependent (BOLD)  
75 responses in areas V1-V4 during contrast detection. They found that *false alarms* (trials on  
76 which the stimulus was absent, but reported as seen) evoked higher responses than *misses*,  
77 (trials on which the stimulus was present, but reported as not seen) suggesting that these  
78 areas encoded perceptual experience of the stimuli rather than the presence of the stimulus  
79 itself. The origin of the spurious activity in the case of *false alarms* is presumably neural  
80 noise in these early areas. Similarly, several intracranial primate electrophysiology studies  
81 have been able to predict the perceptual decisions of monkeys from neural activity  
82 recorded in early visual areas (Britten, Newsome, Shadlen, Celebrini, & Movshon, 1996;  
83 Britten, Shadlen, Newsome, & Movshon, 1992; Michelson, Pillow, & Seidemann, 2017). This  
84 suggests that sensory decisions are influenced by neural noise at an early stage of  
85 processing.

86

87 In this study, we attempt to understand how neural activity governs observer responses in a  
88 two-interval-forced-choice (2IFC) contrast discrimination paradigm, using methods typical of

89 such studies. Two stimuli are presented in a random order, one containing a ‘pedestal’ of a  
90 fixed contrast (here 50%), and the other containing the pedestal plus a ‘target’ contrast  
91 increment. This paradigm involves several complicating factors that must be considered,  
92 including: (i) the observer must retain a neural representation of the first stimulus for  
93 comparison with the second stimulus, (ii) individuals might have idiosyncratic biases to  
94 prefer one or other interval, and (iii) fast acting adaptation (often termed repetition  
95 suppression) effects might reduce the neural response to the second stimulus (and perhaps  
96 also its appearance). We recorded evoked responses using both EEG (Experiment 1) and  
97 MEG (Experiment 2). We perform traditional univariate analyses, and also employ  
98 multivariate pattern analysis to decode participants’ percepts. Advantages of pattern  
99 analysis are that it can detect subtle and complex effects that might be missed by univariate  
100 analyses, is expressed in standard units (classifier decoding accuracy) that are independent  
101 of imaging modality, and permits testing of pattern generalisation across conditions and  
102 time (King & Dehaene, 2014). The high temporal resolution (~1ms) of electromagnetic  
103 recording techniques enabled us to closely examine the timecourse of perceptual decision  
104 making, and the spatial resolution of MEG source space allowed us to investigate the  
105 involvement of discrete anatomical brain areas.

106

107 Our primary motivation was to determine whether the dominant source of neural noise is  
108 located in early sensory brain areas, or later (more frontal) areas involved in making  
109 decisions. To achieve this, our most crucial experimental condition is one in which the target  
110 contrast increment is 0%, meaning that the two stimuli to be compared contain only the  
111 pedestal and are therefore physically identical. Any differences in the neural representation  
112 that correspond to perceptual decisions must be due to processes occurring within the  
113 participant’s nervous system, rather than due to differences in the stimulus. We also  
114 included conditions in which the target contrast was >0% in order to measure  
115 psychophysical accuracy, to keep participants motivated, and to provide information on the  
116 timecourse of contrast discrimination when physical stimuli differ.

117

## 118 **2 Methods**

119

### 120 *2.1 Participants*

121

122 Twenty-two adults with normal or corrected-to-normal vision took part in Experiment 1 and  
123 ten took part in Experiment 2. All participants gave written informed consent. Experiment 1  
124 was approved by the Ethics Committee of the Department of Psychology at the University of  
125 York, and Experiment 2 was approved by the York Neuroimaging Centre Ethics Committee.

126

### 127 *2.2 Stimuli and psychophysical task*

128

129 Stimuli were horizontally oriented sine wave gratings with a spatial frequency of 1c/deg and  
130 a diameter of 10 degrees. The edges of the gratings were blurred by a cosine function. On  
131 each trial, two stimuli were presented: a pedestal stimulus of 50% contrast (where percent  
132 contrast is defined as  $100 \cdot (L_{max} - L_{min}) / (L_{max} + L_{min})$ , where  $L$  is luminance), and a  
133 pedestal+target stimulus consisting of the 50% contrast pedestal plus a target contrast  
134 increment. Five target contrast conditions were used in Experiment 1: 0% (no target), 2%,  
135 4%, 8% and 16%. In Experiment 2 only the 0% (no target) and 16% target contrast conditions

136 were used. Note that in the ‘no target’ conditions, the stimuli displayed were physically  
137 identical and the ‘target’ interval assignment was arbitrary. Participants were not informed  
138 of this, and still made a judgement about which interval appeared higher in contrast.

139

140 The two stimuli on each trial were presented sequentially for 100ms each, with a random  
141 inter-stimulus interval between 400ms and 600ms. The inter-trial interval followed the  
142 participant’s response, and was of variable length between 1000ms and 1200ms to avoid  
143 distortion of ERP averages (Woldorff, 1993). The order of target and non-target intervals  
144 within trials was counterbalanced. Trials of different target contrasts were intermixed and  
145 the order was randomized. Stimulus onsets and participant responses were recorded on the  
146 M/EEG trace using low-latency digital triggers.

147

### 148 *2.3 EEG data collection*

149

150 Event-related potentials were recorded using an ANT Neuroscan EEG system and a 64-  
151 channel Waveguard cap with electrodes arranged according to the 10/20 system. The  
152 ground electrode was positioned at *AFz*, and a whole head average was used as a reference.  
153 Data were digitised at 1kHz using the *ASALab* software. Stimuli were presented on a  
154 ViewPixx 3D display (VPixx Technologies Inc., Quebec, Canada) running in M16 mode (16-bit  
155 luminance resolution) with a mean luminance of 51cd/m<sup>2</sup> and a refresh rate of 120Hz, using  
156 Matlab and elements of the *Psychophysics Toolbox* (Brainard, 1997; Kleiner, Brainard, &  
157 Pelli, 2007; Pelli, 1997). The display was gamma corrected using a Minolta LS110  
158 photometer, fitting the data with a 4-parameter exponential function, and transforming  
159 stimulus intensities using the inverse of the function to ensure linearity.

160

161 Participants were seated in a darkened room 57cm away from the display. Instructions for  
162 the task were to ‘indicate the grating that appeared higher in contrast’. They were asked to  
163 fixate on a central cross throughout the task and used a mouse to indicate their responses.  
164 There were 200 trials per target contrast (1000 trials total, yielding 2000 stimulus-locked  
165 ERPs). The task was run in 5 blocks of approximately 8 minutes, with short breaks in  
166 between.

167

### 168 *2.4 MEG data collection*

169

170 MEG data were recorded using a 4D Neuroimaging Magnes 3600 Whole Head 248 Channel  
171 MEG scanner housed in a purpose-built Faraday cage. The data were recorded at  
172 1017.25Hz, with 400Hz Bandwidth using a High Pass DC filter. Nine channels were identified  
173 as having failed and were removed from all analyses. The location of the head inside the  
174 dewar was continuously monitored throughout the experiment using 5 position indicator  
175 head coils. Stimuli were presented on an Epson EB-G5900 3LCD projector (refresh rate 60Hz;  
176 mean luminance 160cd/m<sup>2</sup>) with a 2-stop ND filter, using *Psychopy* v1.84 (Peirce, 2007). The  
177 projector was gamma corrected using a Minolta LS110 photometer, fitting the data from  
178 each channel (red, green and blue) with a separate exponential function, and transforming  
179 stimulus intensities using the inverse of the function to ensure linearity.

180

181 Participants were seated in a hydraulic chair in front of the projector screen in a dark room.  
182 Prior to the task the three dimensional shape of the participant’s head was registered using

183 a Polhemus Fastrak headshape digitization system. Five fiducial points were used for this  
184 over two registration rounds. If the distance in location between the first and second round  
185 was >2mm, the registration was repeated. When successful, the headshape was then traced  
186 and recorded using a digital wand. This was later coregistered with T1-weighted anatomical  
187 MRI scans of each participant acquired in separate sessions using a 3T GE Signa Excite HDx  
188 scanner (GE Healthcare).

189  
190 Participants fixated on a small central cross throughout the task. The experiment was  
191 completed in a single block consisting of 240 trials per contrast condition (480 trials in total,  
192 yielding 960 stimulus-locked ERPs), with a total acquisition duration of around 20 minutes. A  
193 single hand response pad was used to make responses in the experiment.

### 194 195 *2.5 EEG data analysis*

196  
197 EEG recordings were bandpass filtered from 0.01Hz (cosine ramp) to 30Hz (Hanning  
198 window). They were then epoched into 1 second-long windows (200ms before stimulus  
199 onset to 800ms after) for each interval of every trial. Each epoch was then baselined at each  
200 electrode independently by subtracting the mean response over the 200ms preceding  
201 stimulus onset. ERPs were then sorted by target/non-target intervals for stimulus  
202 classification analysis and then again by selected/non-selected intervals for decision  
203 classification. No artifact rejection was performed, as we have generally found in previous  
204 studies (e.g. Coggan, Baker & Andrews, 2016) that this has no material impact on  
205 classification accuracy when trial numbers are large, stimulus presentations are brief, and  
206 participants are adults (as here).

207  
208 To perform univariate analyses, ERPs were averaged across a cluster of 10 posterior  
209 electrodes (Oz, O1, O2, POz, PO3-8), and significance was determined using cluster  
210 corrected paired-samples t-tests across participants (Maris & Oostenveld, 2007). The  
211 significance of each cluster was determined by comparing to a null distribution of summed  
212 t-values derived by randomly permuting the labels of the largest cluster 1000 times. To  
213 perform multivariate analyses, a support vector machine (SVM) was used to classify the  
214 data independently at each sample point (i.e. in 1ms steps). A second stage of normalization  
215 was applied at each time-point and each electrode by subtracting the mean response across  
216 all intervals and conditions for that time/sensor combination. The data were then randomly  
217 averaged in five subsets of 40 trials for each category (target/non-target or selected/non-  
218 selected), of which four subsets were used to train the model and one was used to test it.  
219 The classifier algorithm creates a parameter space of all data points and then fits a  
220 hyperplane boundary that maximizes the distances between the support vectors of each  
221 category. Classifier accuracy for categorising the test data was averaged across 1000  
222 repetitions of this analysis (with different random allocations of trials on each repetition),  
223 and was repeated for each target contrast condition. We used the same non-parametric  
224 cluster correction procedure as for the univariate analyses (Maris & Oostenveld, 2007) to  
225 identify time periods where classifier accuracy was significantly above chance (using t-tests  
226 across participants). We then averaged timecourses across participants for visualisation  
227 purposes.

### 228 229 *2.6 MEG data analysis*

230

231 Cortical reconstruction and volumetric segmentation was performed with the *Freesurfer*  
232 image analysis suite (<http://surfer.nmr.mgh.harvard.edu/>) using each individual  
233 participant's anatomical MRI scan. Initial MEG analyses were then performed in *Brainstorm*  
234 (Tadel, Baillet, Mosher, Pantazis, & Leahy, 2011). First the MEG sensor array was aligned  
235 with the anatomical model of the participant's head using an automated error minimisation  
236 procedure. Covariance matrices were estimated from the data, and a head model  
237 comprising overlapping spheres was generated. A minimum norm solution was used to  
238 calculate a source model, with dipole orientations constrained to be orthogonal to the  
239 cortical surface. The model consisted of a set of linear weights at each location on the  
240 cortical surface that transformed the sensor space representation into source space.

241

242 MEG data were then imported into Matlab using *Fieldtrip* (Oostenveld, Fries, Maris, &  
243 Schoffelen, 2011), bandpass filtered (using the same filter as for the EEG data) and epoched.  
244 Univariate and multivariate analyses were performed in the same way as described for the  
245 EEG data in section 2.5. This was done using the sensor space representation (with 239  
246 working sensors), the source space representation at approximately 500 vertices evenly  
247 spaced across the cortical mesh, and also within discrete regions of cortex defined by the  
248 Mindboggle atlas (Klein et al., 2017). For this latter analysis, the mean number of vertices in  
249 each cortical region is given in Table A1 in the Appendix. We conducted further analyses  
250 using multiple time-points as observations, at a single spatial (sensor or cortical) location.

251

### 252 **3 Results**

253

#### 254 *3.1 Experiment 1: EEG reveals above-chance classification of percepts*

255

256 Mean event-related potentials (ERPs), averaged over the ten occipital electrodes where the  
257 changes in response from baseline were greatest (Figure 1a), showed a typical response to  
258 brief visual stimulation (black curve, Figure 1a). Clear ERPs were evident for all individual  
259 participants (thin traces, Figure 1a). In the grand average (black curve), two successive  
260 positive responses were evident over occipital electrodes at early time-points (126ms and  
261 225ms after stimulus onset), corresponding to stimulus onset and offset. A later time-point  
262 (594ms after stimulus onset) showed negative voltages in occipital areas and positive  
263 voltages in frontal electrodes (see upper scalp plots for voltage distributions).

264

265 Task performance in the five target contrast conditions ranged from chance in the 0% target  
266 contrast condition (where there was no correct answer as the 'target' interval was  
267 determined arbitrarily) to close to ceiling in the 16% target contrast condition (94% correct).  
268 Average data (black line) and results for individual participants (thin traces) are shown in  
269 Figure 1b, where it is evident that increasing target contrast improved performance for all  
270 participants. We fitted cumulative Gaussian functions to each participant's data to estimate  
271 threshold contrast at 75% correct. The mean threshold was 4.25%, with the distribution  
272 shown at the lower axis of Figure 1b.

273

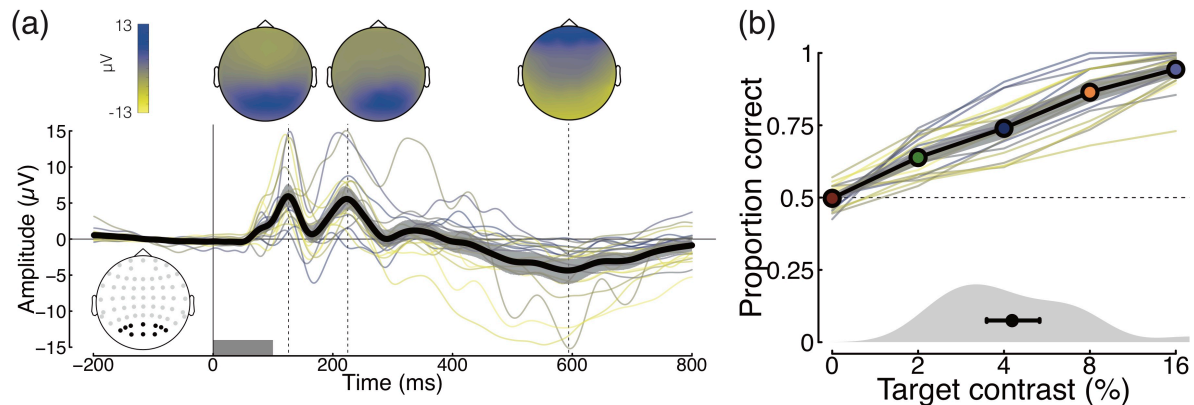

274  
275 Figure 1: Grand mean ERPs (a) and summary of psychophysical performance (b). The black trace in panel (a)  
276 shows the grand mean across all conditions and participants (N=22, with 2000 ERPs per participant), with the  
277 grey shaded region giving 95% confidence intervals derived from 10000 bootstrap resamples. Thinner coloured  
278 traces show results for individual participants. In all cases the evoked responses were averaged across the 10  
279 posterior electrodes shown in the lower left inset. The grey rectangle along the lower axis indicates the period  
280 during which the stimulus was presented. Scalp distributions of voltages at three time points (126ms, 225ms  
281 and 594ms, marked by dashed vertical lines) are shown at the top of the plot. The black line and coloured  
282 symbols in panel (b) show the mean psychophysical performance in each condition, averaged across  
283 participants (N=22), with the grey shaded region giving 95% confidence intervals derived by bootstrapping.  
284 Thinner coloured traces show results for individual participants, and symbol colour corresponds to those used  
285 to indicate target contrast conditions in subsequent figures. The grey curve at the foot shows the distribution  
286 of individual thresholds at the 75% correct point, with the black circle giving the mean, and error bars giving  
287 95% confidence intervals.

288  
289 We first grouped ERP data according to contrast, and compared evoked responses in the  
290 null (pedestal only) and target (pedestal + target) intervals. The upper row of Figure 2a  
291 shows the ERPs averaged across occipital electrodes, with the null interval responses shown  
292 in black, and the target interval responses in colour. The middle row of Figure 2a shows the  
293 differences between these two ERPs, with horizontal lines at  $y=-1.5$  indicating time points  
294 showing cluster-corrected significant differences. For a target contrast of 0%, the two  
295 stimuli are identical, and there are no meaningful differences between the waveforms (the  
296 two brief periods of significance are type I errors by definition). As target contrast increases,  
297 significant differences emerge between 100ms and 700ms post stimulus onset. These likely  
298 reflect both differences in early evoked responses, and also later decision-related  
299 components. Multivariate analyses across all 64 electrodes showed significant decoding  
300 only at the highest two target contrast levels (lower row of Figure 2a) within the same time  
301 window.

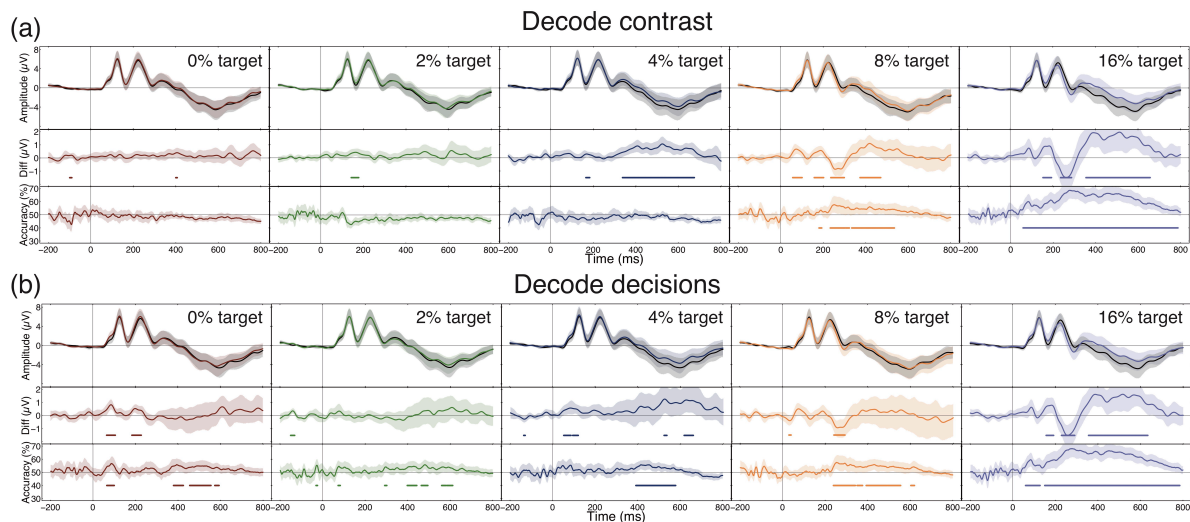

302  
303 Figure 2: Univariate and multivariate analyses of EEG data. Panel (a) shows results for data partitioned  
304 according to the stimulus contrast (pedestal vs pedestal+target), and panel (b) shows results for data  
305 partitioned according to the participants' perceptual decisions (selected vs non-selected). The upper section of  
306 each sub-plot contains grand averages of the ERPs being compared, in which the coloured curve indicates the  
307 target (or selected) waveform, and the black curve indicates the pedestal (or non-selected) waveform. The  
308 middle section of each sub-plot is the difference waveform. The lower section of each sub-plot shows  
309 multivariate classifier performance at each timepoint, where the baseline is 50% correct. In each panel, shaded  
310 regions show 95% confidence intervals across participants (N=22), calculated by bootstrapping. The coloured  
311 horizontal lines in the lower two sections indicate periods of time when the difference waveforms were  
312 significantly different from 0 (middle plots) or accuracy exceeded 50% correct (lower plots), calculated using a  
313 nonparametric cluster correction procedure (Maris & Oostenveld, 2007).

314  
315 Next, we repeated the analyses on the same data, but this time organised according to the  
316 participants' decisions rather than the physical stimulus contrast. In other words, we took  
317 ERPs from the intervals selected by the participants as appearing higher in contrast, and  
318 compared these with ERPs from the non-selected intervals. This analysis revealed additional  
319 time periods where the ERPs were significantly different, particularly in the 0% target  
320 condition, where differences were observed at around 100ms post stimulus onset. This  
321 finding was echoed in the multivariate analyses, which showed above chance decoding at  
322 early time points (around 100ms), as well as a sustained period of above chance decoding at  
323 all target contrasts from around 400-600ms post stimulus onset. The 0% target condition is  
324 of particular interest for this analysis, as any differences between evoked responses are not  
325 determined by the stimulus (which is identical in both intervals), and must be a  
326 consequence of differences in neural activity. The early significant clusters in both univariate  
327 and multivariate analyses indicate differences in the amplitude of the evoked response that  
328 influence subsequent perceptual decisions. Higher target contrasts increasingly converge  
329 with the contrast decoding analysis, as performance approaches ceiling (see Figure 1b) and  
330 the majority of selected intervals also contained the target (e.g. results for the 16% target  
331 condition are near identical in Figure 2a,b).

332  
333 We tested the generality of the multivariate results in two ways. First, we took the classifier  
334 trained to discriminate between perceptual decisions at the highest target contrast (16%),  
335 and used this model to predict performance at lower target contrasts. This analysis (shown  
336 in Figure 3a) replicates the early periods of above chance decoding for 0% target contrast  
337 trials, suggesting that observers use a similar decision strategy for very challenging



338 discriminations as for easier ones. Next, we took the classifier trained at each time point,  
339 and used it to predict selected and non-selected trials at all other time points (King &  
340 Dehaene, 2014). The results of this temporal generalization analysis (shown in Figure 3b,c)  
341 reveal isolated early structures around 100ms, and a more sustained pattern from 400-  
342 600ms (in the 0% condition) and from 200-800ms (in the 16% condition). We propose (see  
343 Discussion) that the early periods of above chance decoding may represent neural noise at  
344 the initial stages of processing, and the later periods could reflect noise in perceptual  
345 decisions, or memory traces from the first temporal interval.  
346

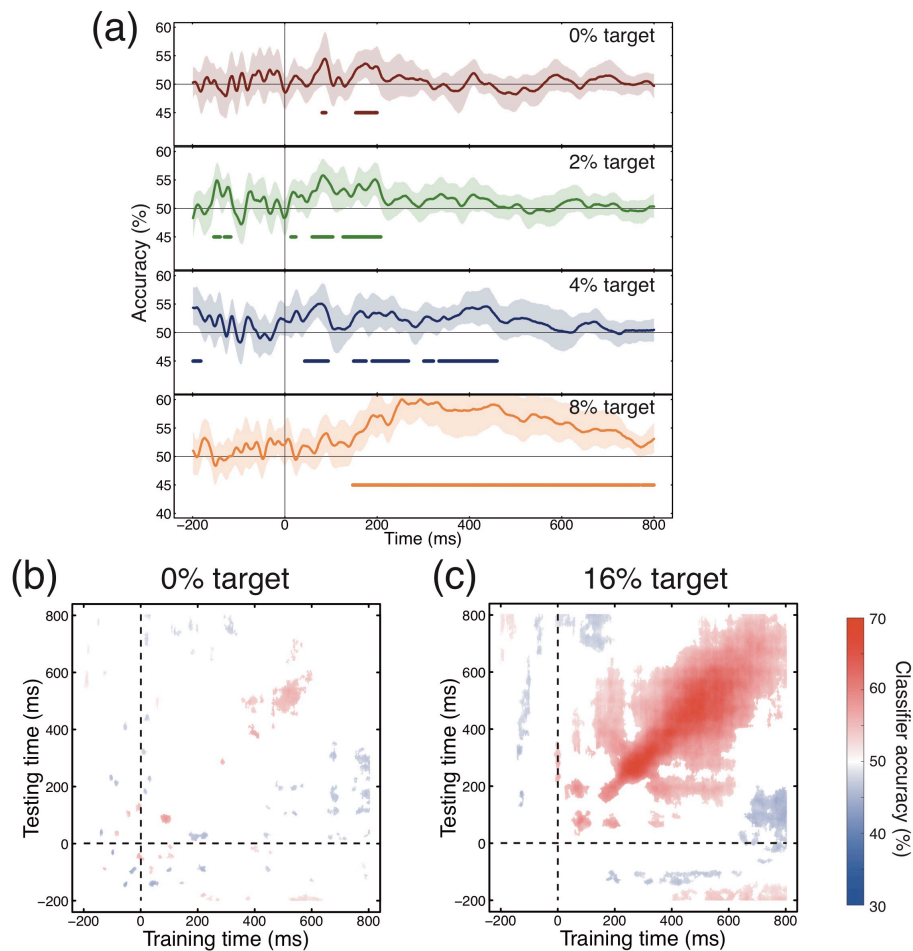

347  
348 Figure 3: Multivariate generalization analyses across contrast condition (a) and time (b,c), for data partitioned  
349 according to the participants' perceptual decisions. Panel (a) shows classifier accuracy at the four lower target  
350 contrasts after training the algorithm at the highest target contrast. Plotting conventions are as described for  
351 the multivariate analyses shown in Figure 2. Panels (b,c) show classifier accuracy when trained at each time  
352 point independently, and then tested using data at all time points. Regions outside of clusters where classifier  
353 accuracy differed significantly from chance (50% correct) are shaded white.  
354

### 355 *3.2 Interval biases and decoding within the first or second interval*

356

357 The temporal structure of a 2IFC trial is necessarily asymmetric, as the observer has  
358 knowledge of the first interval by the time they experience the second interval. In addition,  
359 repetition suppression effects can affect the evoked amplitude of the second presentation  
360 (Grill-Spector, Henson, & Martin, 2006). We first compared the average ERPs for all  
361 pedestal-only presentations (where the stimulus contrast was 50%) across the two intervals.

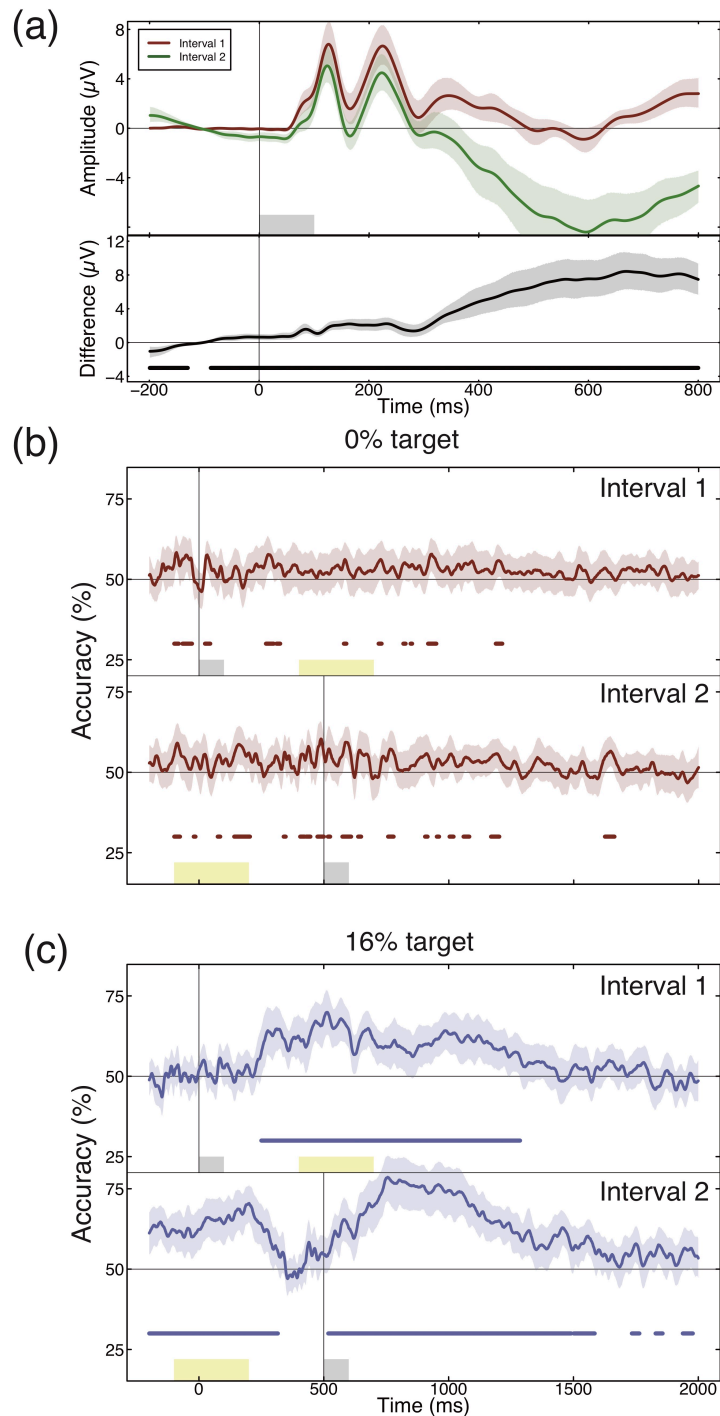

362  
363  
364  
365  
366  
367  
368  
369  
370  
371  
372  
373  
374

Figure 4: Comparisons across trial intervals. Panel (a) shows evoked responses in the first (red curve) and second (green curve) intervals of a 2IFC trial (upper plot) and their difference (lower plot). The evoked response is generally more negative in the second interval, particularly at time points >250ms after stimulus onset, despite the contrasts being physically identical (both 50%). Panels (b,c) show multivariate pattern classifier accuracy when comparing evoked potentials time-locked to either the first interval (upper plots) or the second interval (lower plots), for target contrasts of 0% (panel b) or 16% (panel c). In each plot, the shaded grey region shows the presentation of the stimulus from that interval and the yellow shaded region shows the range of time points when the stimulus from the other interval was presented (the precise inter-stimulus interval was jittered on each trial to reduce entrainment of ERP averages). In all panels shaded regions around each curve show 95% confidence intervals across participants, and horizontal coloured lines indicate significant clusters, consistent with conventions in previous figures.

375 We find both subtle and gross differences between these waveforms (see Figure 4a). Before  
376 stimulus onset, the waveforms differ as the second interval (green trace) has a decreasing  
377 voltage during the 200ms before the stimulus is presented. This likely originates from the  
378 tail end of the evoked response from the first interval (see Woldorff, 1993), which is  
379 decreasing from 400-600ms (the time window in which the second interval occurred). The  
380 second interval then has a more generally negative voltage throughout the 800ms following  
381 stimulus onset. The magnitude of this difference is much greater than that at stimulus  
382 onset, and so would persist even with a different baseline normalization regime (e.g. if the  
383 voltages were normalized to those at  $t=0$ ). Furthermore, the differences become much  
384 more substantial at later time points, from 400-800ms. This may relate to the perceptual  
385 decision and motor response that the participant must make following the second interval.

386  
387 Do these substantial differences in the evoked response to two physically identical stimuli  
388 affect the observer's perception of the stimulus, or their decision over which interval to  
389 choose? We estimated interval bias for all participants by calculating the proportion of trials  
390 on which the second interval was selected, for the 200 trials in the 0% target contrast  
391 condition (where the two stimuli are identical). If this index is significantly below 0.5, it  
392 indicates a bias towards the first interval, and if it is significantly above 0.5 it indicates a bias  
393 towards the second interval. Despite individuals showing idiosyncratic biases (indices  
394 ranged from 0.23 to 0.92), the mean bias index was precisely 0.5 (SD: 0.14) and not  
395 significantly different from it ( $t_{21}=0.11$ ,  $p=0.91$ ). The substantial voltage differences (Figure  
396 4a) therefore do not appear to reflect group level differences in the appearance of the  
397 stimuli across intervals, and any idiosyncratic biases would presumably only reduce the  
398 power of our decision-based decoding analyses (Figure 2b), which are nevertheless  
399 significant.

400  
401 The size of the voltage differences across intervals prompted us to investigate the extent to  
402 which decisions can be decoded within one or other interval, making comparisons across  
403 trials (within an interval) instead of across intervals (within a trial). The finite number of  
404 trials, combined with the presence of interval biases for some observers (see above) meant  
405 that there were often different numbers of trials available in the two intervals, so it was  
406 necessary to train and test the classifier on averages of fewer than 40 trials in some cases.  
407 The results of this multivariate analysis are shown in Figure 4b/c for decoding perceptual  
408 decisions at 0% contrast (Fig 4b) and at 16% contrast (Fig 4c), and for all conditions in Figure  
409 A1. In each sub-plot, the upper trace shows the classifier performance for data from interval  
410 1 (with ERPs aligned at  $t=0$ ms), and the lower trace shows the classifier performance for  
411 data from interval 2 (with ERPs aligned at  $t=500$ ms). The yellow shaded regions indicate the  
412 time window when the stimulus in the other interval was displayed (the jittered inter-  
413 stimulus interval means that this time window is probabilistic rather than exact). Overall, we  
414 find increased decoding accuracy in the second interval compared with the first. This  
415 presumably reflects the increased information available for making a decision following the  
416 second stimulus.

417  
418 *3.3 Experiment 2: source space decoding is more sensitive than sensor space decoding*

419  
420 We confirmed that our MEG data replicated the key effects from Experiment 1 in several  
421 ways. First, we performed univariate and multivariate analyses in sensor space, using a

422 cluster of 8 left-posterior sensors for the univariate analysis (defined as sensors located in  
 423 the posterior portion of the helmet where activity at 110ms was significantly greater than  
 424 0), and all working sensors (N=239) for the multivariate analysis. The results of this analysis  
 425 are shown in Figure 5a,c for the data split by participants' perceptual decisions. Consistent  
 426 with the EEG results, we find above chance pattern classification at early time points  
 427 (~100ms) as well as later >200ms. Second, we performed complementary analyses in MEG  
 428 source space, using ERPs from pericalcarine cortex (corresponding to early visual cortex) for  
 429 the univariate analyses, and a subset of 500 vertices across the entire cortical surface for  
 430 the multivariate analyses. The results of this analysis are shown in Figure 5b,d. The general  
 431 pattern of results is consistent with the sensor space analysis, though the shape of the ERP  
 432 waveforms from pericalcarine cortex is somewhat different from those recorded in sensor  
 433 space, with the peak of the onset response appearing more prominent. Interestingly, we  
 434 found that the multivariate analysis produced greater classification accuracy in source space  
 435 (maximum of 80% correct) versus sensor space (maximum of 72% correct). We discuss  
 436 possible reasons for this in the Discussion. Having confirmed that the multivariate source  
 437 space analysis can decode perceived contrast, we next asked which brain regions contained  
 438 information relevant to the task.  
 439

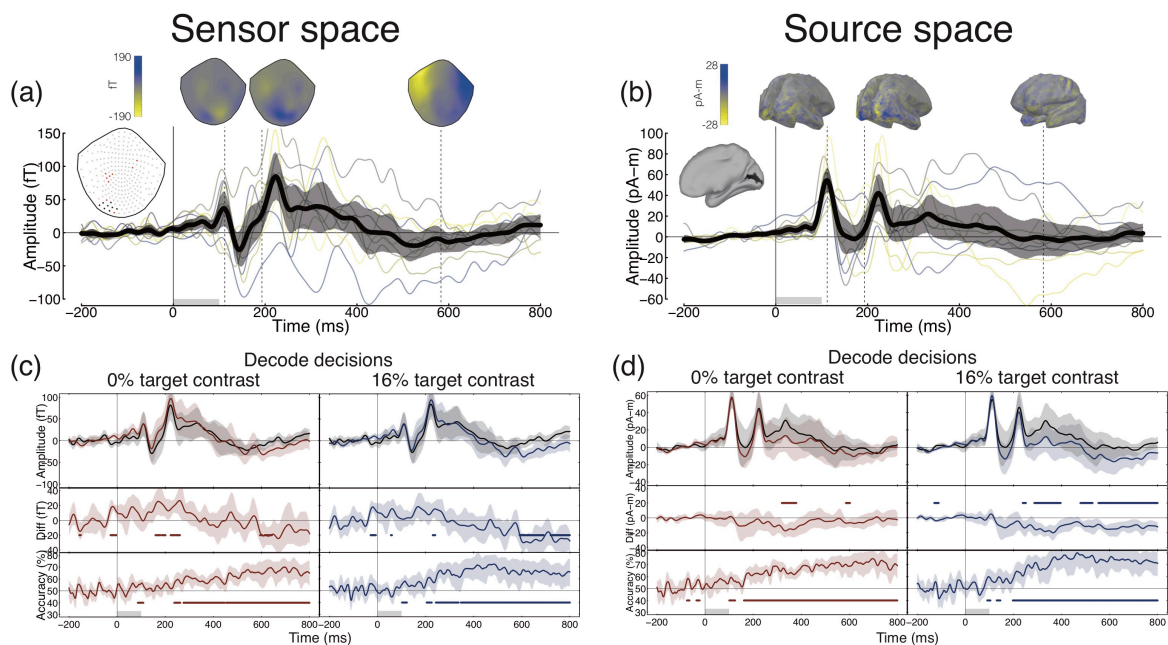

440  
 441 Figure 5: Sensor space and source space MEG analysis. Panel (a) shows the grand average ERP for all  
 442 conditions and participants, pooled across a subset of MEG sensors highlighted in black in the leftmost inset  
 443 (red points are faulty sensors). Magnetic field distributions across the sensor array are shown at three time  
 444 points at the top of the plot. Panel (b) shows a similar analysis in source space, for a region of cortex around  
 445 the calcarine sulcus (highlighted black in the leftmost inset). The evoked response at each vertex on the  
 446 cortical mesh was normalised such that the 110ms deflection was always positive, to avoid signal cancellation  
 447 due to polarity inversions. In both panels, thin coloured curves represent individual participants (N=10). Panels  
 448 (c,d) show univariate and multivariate comparisons between selected and non-selected ERPs in both contrast  
 449 conditions, in the same format as described for Figure 2. Panel (c) shows this analysis in sensor space, and  
 450 panel (d) shows the same analysis in source space. The source space multivariate analyses used a matrix of  
 451 around 500 points distributed across the surface of the cortex.  
 452

### 453 3.4 Classification in anatomically-defined brain regions

454

455 We divided the cortex into 31 discrete non-overlapping anatomical regions using the  
456 *Mindboggle* atlas (Klein et al., 2017) (see Figure 6b). Maximal evoked potentials in these  
457 regions showed clear differentiation (see Figure A2). Because regions differed in size, each  
458 area contributed a different number of vertices on the cortical mesh for pattern  
459 classification (see Table A1).  
460

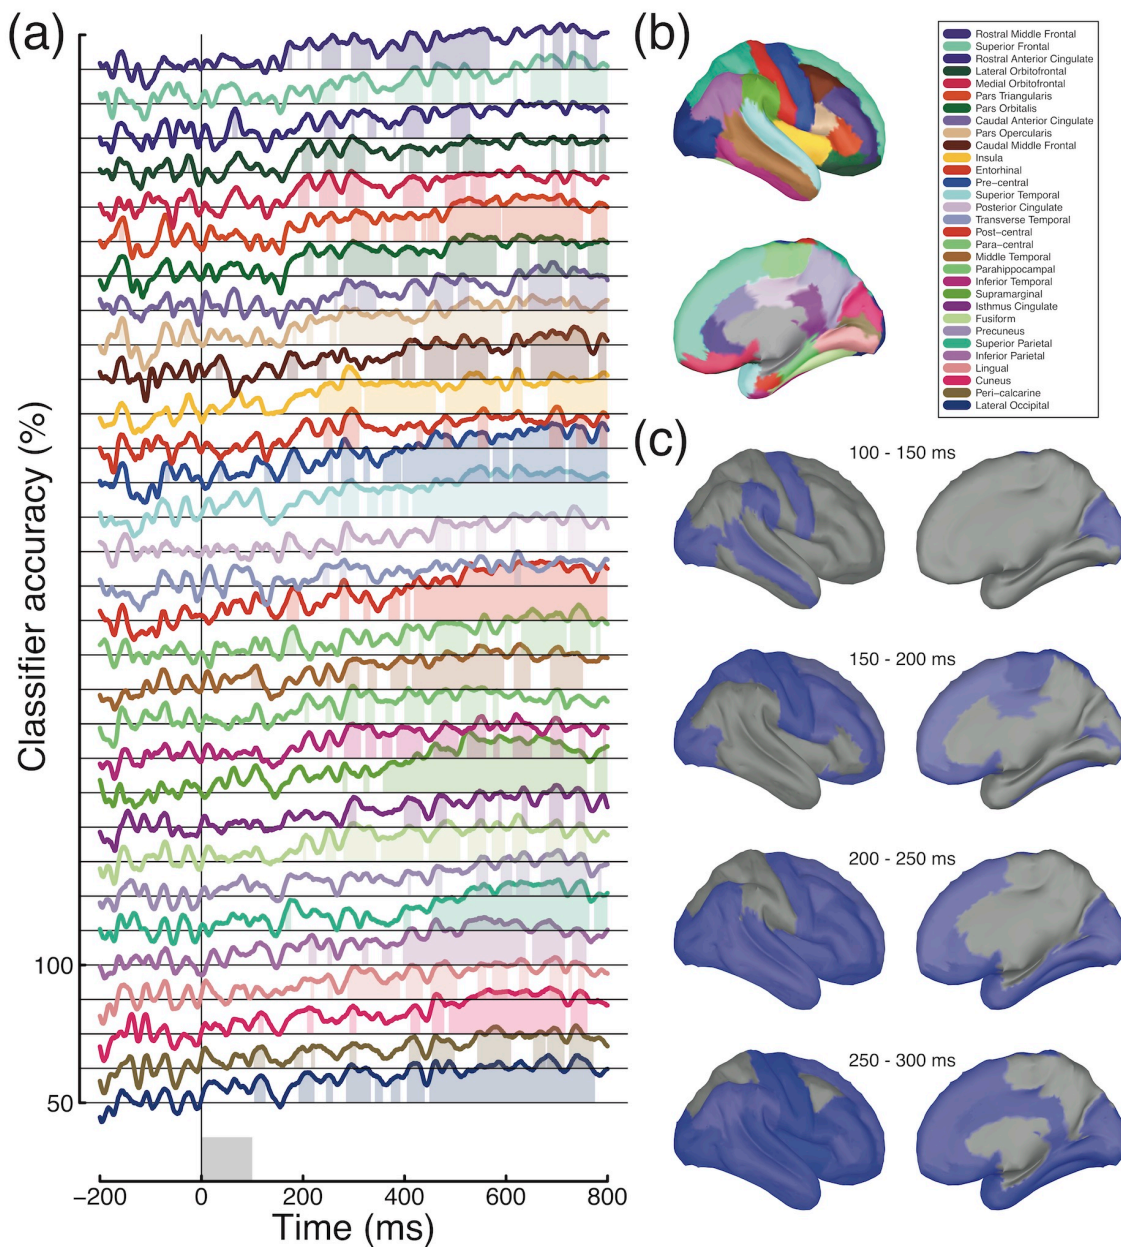

461  
462 Figure 6: Atlas-based classification of decisions in the 0% target condition. Timecourses in panel (a) indicate  
463 classifier performance for each brain region, organised from anterior (top) to posterior (bottom) (see legend in  
464 panel b). These are offset vertically by 12.5% for each subsequent region for clarity, with the 50 and 100%  
465 labels relating to the bottom region but providing a common scale for each region. Shaded regions in panel (a)  
466 indicate clusters in which classification performance was significantly above chance (Bonferroni corrected for  
467 31 brain regions). In panel (c), regions containing significant clusters within a given time window are shown in  
468 blue.

469  
470 At early time points, around 100ms, information in three adjacent regions around the  
471 occipital pole (the peri-calcarine region, the cuneus and the lateral occipital cortex) could be

472 used to decode the participant's percept in the 0% target contrast condition (final three  
473 traces in Figure 6a). Over time, this information spread forward to frontal and temporal  
474 cortex (see Figure 6c). By 300ms following stimulus onset, almost the entire brain contains  
475 information relevant to the task. This includes regions that do not appear to respond  
476 directly to presentation of visual stimuli (i.e. where there is no obvious evoked response,  
477 see Figure A2). A similar pattern of results is evident in the 16% target contrast condition  
478 (see Figure A3), confirming our earlier finding that differences in physical and perceived  
479 contrast are processed in a similar fashion.

480

## 481 **4 Discussion**

482

483 The present study investigated the timecourse and location of perceptually relevant neural  
484 noise in contrast discrimination, using univariate and multivariate analysis of EEG and MEG  
485 data. Our results show that perceptual decisions are partly determined by responses in early  
486 visual cortex even when the two stimuli in a discrimination task are physically identical. This  
487 indicates that perceptually relevant neural noise impacts at the initial stages of processing  
488 and affects stimulus encoding in the visual system. However the best classifier performance  
489 occurred at later time points (>400ms), suggesting that additional sources of noise might  
490 also be involved. Analysis of differences across trial intervals revealed that neural activity in  
491 the second interval was more closely associated with subsequent decisions. We will now  
492 discuss the implications of these finding for our understanding of how neural activity (both  
493 evoked and spontaneous) influences the perceptual decisions involved in sensory  
494 discrimination.

495

### 496 *4.1 Superior classification in MEG source space*

497

498 Classifier performance overall was much higher for MEG data than for EEG data in identical  
499 conditions, despite the larger sample size of the EEG study (N=22 for EEG vs. N=10 for MEG).  
500 This is presumably due to the greater intrinsic sensitivity of MEG sensors, and the greater  
501 sampling density across the scalp (N=64 for EEG vs. N=239 for MEG). Classifier accuracy was  
502 also consistently higher in source space than in the sensor space representation primarily  
503 used in previous MEG studies (Cichy, Pantazis, & Oliva, 2014; Clarke, Devereux, Randall, &  
504 Tyler, 2015; Mostert, Kok, & de Lange, 2016). Since the source space representation is a  
505 weighted linear combination of activity at the sensors, this might be somewhat surprising.  
506 However, the source reconstruction presumably weights out signals from outside the brain  
507 (e.g. heart rate, breathing and blinking artefacts, and noise from outside of the scanner),  
508 resulting in a cleaner signal. Some form of source localisation may therefore be a useful  
509 processing step in future studies attempting multivariate classification of MEG signals.  
510 Additionally, combining the source space representation with atlas-based multivariate  
511 analysis permits questions to be asked about the information contained in specific brain  
512 regions at different points in time.

513

### 514 *4.2 Single interval versus 2IFC*

515

516 One distinction between this and most previous studies on the neural correlates of  
517 perceptual decision making is that previous work has used single interval (yes/no)  
518 paradigms (Hesselmann, Kell, Eger, & Kleinschmidt, 2008; Hillyard, Squires, Bauer, &

519 Lindsay, 1971; Jolij, Meurs, & Haitel, 2011; Mostert et al., 2016; Ress & Heeger, 2003;  
520 Schölvinc, Friston, & Rees, 2012; Squires, Squires, & Hillyard, 1975), whereas here we used  
521 a 2IFC design. Since most psychophysical studies of contrast discrimination have used 2IFC,  
522 this choice has direct relevance to previous work. Additional benefits are that the number of  
523 evoked potentials in the selected and non-selected categories were necessarily balanced,  
524 and it was possible to analyse perceptual decisions based on two physically identical stimuli.  
525 In addition, 2IFC designs avoid problems with differences in bias (or response criteria)  
526 between participants, as pairs of stimuli are compared directly on a given trial (rather than  
527 against an internal standard). However, 2IFC cannot distinguish between hits and correct  
528 rejections (as these comprise 'correct' trials) or between misses and false alarms (incorrect  
529 trials), so direct comparisons of these trial categories is not possible in our design.

530

531 Another feature of 2IFC paradigms is that participants must hold information about the  
532 stimulus from the first interval in memory until after the second stimulus has been  
533 presented. This process may account for the sustained patterns of activity that permit  
534 classification long after stimulus offset (see Figures 2-6). In particular, our analysis of  
535 interval-specific effects (see Figure 4b,c) shows greater multivariate decoding accuracy in  
536 the second interval, presumably because at this point in the trial the observer has obtained  
537 all information necessary to make a decision.

538

#### 539 *4.3 Multiplicative noise*

540

541 An alternative account of contrast discrimination performance at high pedestal contrasts is  
542 that transduction is linear but internal noise is signal-dependent (Pelli, 1985). If the  
543 dominant source of noise were early and multiplicative, this would avoid any issues relating  
544 to Birdsall's theorem, as the transducer could be linear. It has proven difficult to distinguish  
545 between the multiplicative and additive noise accounts purely from contrast discrimination  
546 experiments (Georgeson & Meese, 2006; Kontsevich, Chen, & Tyler, 2002). At a single  
547 neuron level there is well-established evidence of multiplicative noise (Tolhurst, Movshon,  
548 & Dean, 1983), yet it appears that across populations of neurons with different sensitivities  
549 the overall noise is effectively additive (Chen, Geisler, & Seidemann, 2006). Since evidence  
550 from fMRI (Boynton et al., 1999), EEG (Busse et al., 2009) and psychophysics (Kingdom,  
551 2016) all argue strongly against a linear transducer, we think this explanation is unlikely to  
552 account for the body of available data.

553

#### 554 *4.4 Resolving early noise and Birdsall's theorem*

555

556 Early noise has typically been considered at very early stages, including photoreceptor noise  
557 in the retina (Barlow, 1962), which can be considered as external noise (albeit in a different  
558 sense from experimentally added external noise, as it is not under the direct control of the  
559 experimenter). Late additive noise is often assumed (either implicitly or explicitly) to be  
560 added at the decision stage, long after the nonlinearities of early visual processing (Cabrera,  
561 Lu, & Doshier, 2015; Mueller & Weidemann, 2008). The results here point to a perceptually-  
562 relevant source of noise that is present in the early evoked response, at around 100ms or  
563 earlier. However we find that classification performance improves after this point in  
564 processing, reaching a maximum approximately 400-600ms after target onset (see Figures 2  
565 & 5). In addition, our temporal generalisation analysis (see Figure 3b,c) shows that these

566 two time windows involve distinct patterns of neural activity, implying separate sources of  
567 noise. This is consistent with a sequence of multiple (and presumably independent) noise  
568 sources at different stages of processing. Since mathematical treatment of complex systems  
569 involving multiple nonlinearities and noise sources is currently lacking, it is unclear what  
570 implications this would have for the visibility of early nonlinearities.

571

572 One possibility is that a strong source of noise occurs immediately after the initial contrast  
573 transduction nonlinearity in V1, leaving that nonlinearity visible but obscuring later ones.  
574 This would explain why psychophysical contrast perception maps closely onto the neural  
575 response from early visual areas (Baker & Wade, 2017; Barlow, Hawken, Parker, & Kaushal,  
576 1987; Boynton et al., 1999), but not the highly compressive contrast-invariant response in  
577 later regions (Avidan et al., 2002; Rolls & Baylis, 1986). Indeed, this might enable the visual  
578 system to harness the properties of Birdsall linearisation to preserve the dynamic range of  
579 early representations through later processing (that is more compressive) when making  
580 comparisons across stimuli (as in a discrimination paradigm). Object recognition, and other  
581 operations that benefit from invariance to features such as contrast, position and size, but  
582 do not require comparisons across multiple stimuli, would be immune to the Birdsall effect  
583 and benefit from the later nonlinearities. Furthermore, a strong early source of noise would  
584 make the study of later 'mid-level' visual processes much more challenging, perhaps  
585 explaining why vision research has typically focussed on earlier mechanisms and can be  
586 caricatured as being 'stuck' in V1 (Graham, 2011; Peirce, 2007).

587

588 In order to investigate these possibilities further, we performed two additional analyses. To  
589 link the internal fluctuations measured in our experiments with a psychophysical measure of  
590 internal noise, we correlated classifier accuracy with the contrast discrimination thresholds  
591 estimated from the psychophysical responses in Experiment 1. Since high internal noise  
592 should result in higher discrimination thresholds (poorer performance), we predicted that  
593 the two measures would be correlated at time points where the neural fluctuations were  
594 most relevant to perception. This analysis is shown in Figure 7, and reveals a time window  
595 with significant negative correlations around 450-650ms (i.e. high thresholds correspond to  
596 poor classifier performance). We speculate that neural noise within this time window most  
597 closely corresponds to the 'late' additive noise that is a feature of contemporary models of  
598 contrast discrimination. However it is also possible that other factors mediate this  
599 relationship, including the interval bias described in the Results section which could inflate  
600 negative correlations by driving thresholds up and classifier performance down.  
601 Nevertheless, it is interesting to demonstrate a link between psychophysical thresholds and  
602 decoding of neural responses.

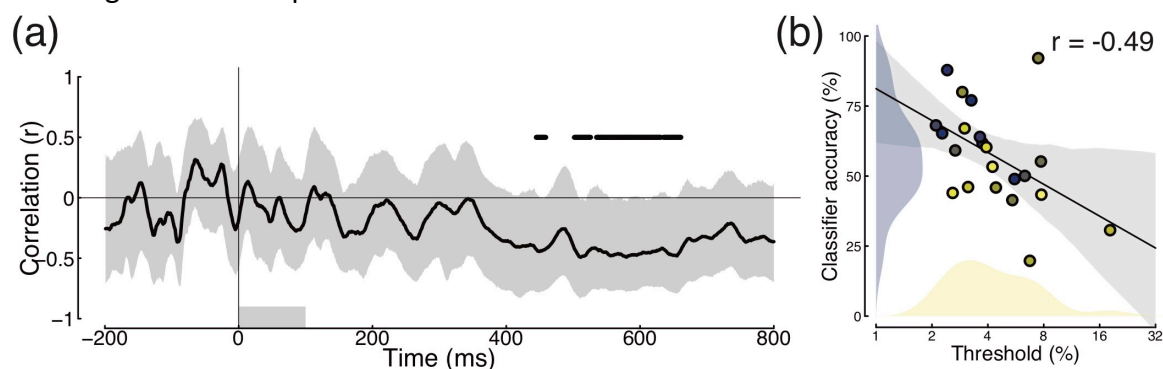

603



604 Figure 7: Correlation between individual contrast discrimination thresholds (see distribution in Figure 1b) and  
605 classifier accuracy in the 0% target contrast condition of Experiment 1 (N=22). Panel (a) shows the correlation  
606 as a function of time. The horizontal black lines at  $r=0.5$  denote clusters of significant effects (two-tailed),  
607 according to a nonparametric cluster correction procedure (Maris & Oostenveld, 2007). Grey shaded regions  
608 represent bootstrapped 95% confidence intervals calculated across participants, and the lower grey rectangle  
609 shows the period when the stimulus was displayed. To further illustrate this relationship, panel (b) shows a  
610 scatterplot of the correlation between thresholds and the averaged classifier performance within all significant  
611 clusters identified in (a). The diagonal line is the best fitting Deming regression line, with grey shaded regions  
612 showing bootstrapped 95% confidence intervals, and blue and yellow histograms showing the distribution of  
613 values for each measure.

614

615 The final analysis we performed was inspired by the suggestions of an anonymous reviewer,  
616 who pointed out that in our main multivariate analyses, although the classifier is always  
617 trained on information from both trial intervals, test data are supplied from one interval at a  
618 time. This means that the classifier's decisions differ from those of human participants, who  
619 in a 2IFC paradigm always have information available from both trial intervals. We  
620 conducted further multivariate analyses, by training and testing the classifier on  
621 downsampled timecourses of entire 2IFC trials combined across both intervals (to account  
622 for the jittered ISI, each interval was aligned to its respective trigger).

623

624 The results of this analysis are shown in Figure 8 for the EEG experiment (Figure 8a,c), and  
625 for the MEG experiment in both sensor space (Figure 8b,d) and source space (Figure 8e,f).  
626 All data sets produced above-chance classification at some sensors and brain regions,  
627 indicating that patterns across time were able to discriminate neural states. For the 16%  
628 target contrast, early visual areas at the occipital pole showed high classifier accuracy  
629 (Figure 8f), consistent with the salient target contrast increment producing greater ERP  
630 amplitudes in the target interval (see Figures 2 & 5). For the 0% target contrast condition,  
631 accuracy in early visual regions was relatively poor, and the highest accuracy was in fronto-  
632 parietal regions (Figure 8e). This suggests that the most important signals for classifying  
633 decisions in this condition arise after the initial responses in visual brain areas. The later  
634 sustained response from around 400ms onwards (see Figures 2b & 3b) seems more  
635 consistent with the brain regions producing significant decoding here. These additional  
636 analyses suggest that the internal noise sources most relevant for contrast discrimination  
637 performance occur subsequent to the initial visual cortical responses, and are therefore  
638 more consistent with models of 'late' noise than with early internal (or unintended external)  
639 noise.

640

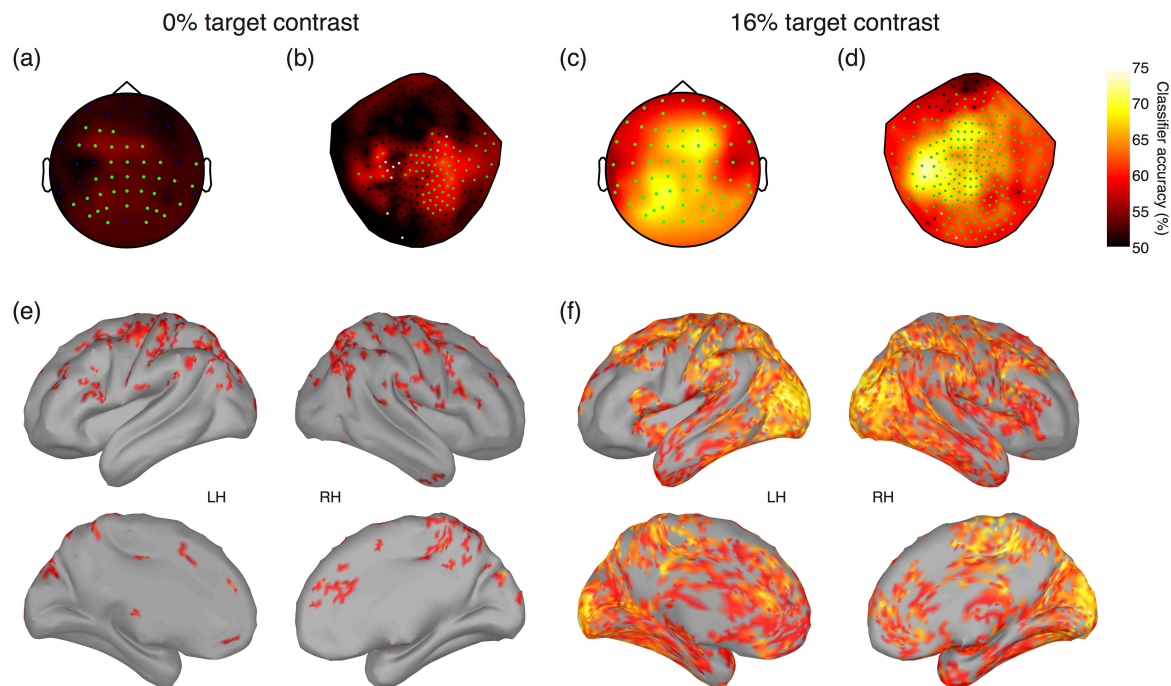

641  
642 Figure 8: Whole-trial pattern classification accuracy in sensor space and source space. Entire time courses of  
643 both 2IFC intervals were categorised according to participant percepts (selected vs non-selected), and  
644 downsampled in steps of 10ms. Classifier accuracy was averaged across participants at individual electrodes in  
645 the EEG experiment (panels a,c), in sensor space in the MEG experiment (panels b,d) and at 15000 vertices on  
646 the cortical surface in source space in the MEG experiment (panels e,f). Sensors comprising significant clusters  
647 are marked by green points in panels a-d, and vertices not part of significant clusters are coloured grey in  
648 panels e,f.

649

#### 650 4.5 Conclusion

651

652 To summarise, in this study we investigated the timecourse of the neural operations  
653 involved in contrast discrimination. We demonstrated that internal noise impacting early in  
654 time (around 100ms after stimulus onset) and in the visual pathway can affect sensory  
655 processing and perceptual decisions. However, the strongest internal noise source was later  
656 (around 400-700ms), involved parietal and frontal brain regions, and was correlated with  
657 psychophysical thresholds. Our novel application of multivariate analysis methods to  
658 discrete spatial regions of MEG source space offers the capability of studying how the brain  
659 represents information in both space and time.

660

#### 661 Data and code availability statement

662

663 Analysis scripts, experiment code and raw EEG data are publicly available on the *Open*  
664 *Science Framework* website, at the following URL: <http://doi.org/10.17605/OSF.IO/GBHQJ>

665

666 MEG data are not publicly available for this project. The reason for this is that ethical  
667 approval and informed consent were not sought for sharing these data publicly. In particular  
668 the structural MRI scans could in principle be used to identify individuals (e.g. by generating  
669 a 3D model of their faces). It may be possible to share these data with individual  
670 researchers, subject to ethical approval from the York Neuroimaging Centre. Please contact  
671 Dr Daniel Baker ([daniel.baker@york.ac.uk](mailto:daniel.baker@york.ac.uk)) if you wish to pursue this.

672 **5 References**

673

674 Avidan, G., Harel, M., Hendler, T., Ben-Bashat, D., Zohary, E., & Malach, R. (2002). Contrast  
675 sensitivity in human visual areas and its relationship to object recognition. *Journal of*  
676 *Neurophysiology*, *87*(6), 3102–3116.

677 Baker, D. H., & Wade, A. R. (2017). Evidence for an Optimal Algorithm Underlying Signal  
678 Combination in Human Visual Cortex. *Cerebral Cortex*, *27*, 254–264.  
679 <http://doi.org/10.1093/cercor/bhw395>

680 Barlow, H. B. (1962). A method of determining the over-all quantum efficiency of visual  
681 discriminations. *The Journal of Physiology*, *160*, 155–168.

682 Barlow, H. B., Hawken, M., Parker, A. J., & Kaushal, T. P. (1987). Human contrast  
683 discrimination and the threshold of cortical neurons. *Journal of the Optical Society of*  
684 *America A*, *4*(12), 2366. <http://doi.org/10.1364/JOSAA.4.002366>

685 Boynton, G. M., Demb, J. B., Glover, G. H., & Heeger, D. J. (1999). Neuronal basis of contrast  
686 discrimination. *Vision Research*, *39*(2), 257–269. [http://doi.org/10.1016/S0042-](http://doi.org/10.1016/S0042-6989(98)00113-8)  
687 [6989\(98\)00113-8](http://doi.org/10.1016/S0042-6989(98)00113-8)

688 Brainard, D. H. (1997). The Psychophysics Toolbox. *Spatial Vision*, *10*, 433–436.

689 Britten, K. H., Newsome, W. T., Shadlen, M. N., Celebrini, S., & Movshon, J. A. (1996). A  
690 relationship between behavioral choice and the visual responses of neurons in  
691 macaque MT. *Visual Neuroscience*, *13*(01), 87–100.  
692 <http://doi.org/10.1017/S095252380000715X>

693 Britten, K. H., Shadlen, M. N., Newsome, W. T., & Movshon, J. A. (1992). The analysis of  
694 visual motion: a comparison of neuronal and psychophysical performance. *The Journal*  
695 *of Neuroscience: The Official Journal of the Society for Neuroscience*, *12*(12), 4745–  
696 4765.

697 Busse, L., Ayaz, A., Dhruv, N. T., Katzner, S., Saleem, A. B., Scho, M. L., ... Carandini, M.  
698 (2011). The Detection of Visual Contrast in the Behaving Mouse, *31*(31), 11351–11361.  
699 <http://doi.org/10.1523/JNEUROSCI.6689-10.2011>

700 Busse, L., Wade, A. R., & Carandini, M. (2009). Representation of Concurrent Stimuli by  
701 Population Activity in Visual Cortex. *Neuron*, *64*(6), 931–942.  
702 <http://doi.org/10.1016/j.neuron.2009.11.004>

703 Cabrera, C. A., Lu, Z.-L., & Doshier, B. A. (2015). Separating decision and encoding noise in  
704 signal detection tasks. *Psychological Review*, *122*(3), 429–460.  
705 <http://doi.org/10.1037/a0039348>

706 Campbell, F. W., & Kulikowski, J. J. (1972). The visual evoked potential as a function of  
707 contrast of a grating pattern. *The Journal of Physiology*, *222*(2), 345–356.  
708 <http://doi.org/10.1113/jphysiol.1972.sp009801>

709 Carandini, M. (2004). Amplification of trial-to-trial response variability by neurons in visual  
710 cortex. *PLoS Biology*, *2*(9). <http://doi.org/10.1371/journal.pbio.0020264>

711 Chen, Y., Geisler, W. S., & Seidemann, E. (2006). Optimal decoding of correlated neural  
712 population responses in the primate visual cortex. *Nature Neuroscience*, *9*(11), 1412–  
713 1420. <http://doi.org/10.1038/nn1792>

714 Cichy, R. M., Pantazis, D., & Oliva, A. (2014). Resolving human object recognition in space  
715 and time. *Nature Neuroscience*, *17*(3), 455–462. <http://doi.org/10.1038/nn.3635>

716 Clarke, A., Devereux, B. J., Randall, B., & Tyler, L. K. (2015). Predicting the Time Course of  
717 Individual Objects with MEG. *Cerebral Cortex*, *25*(10), 3602–3612.  
718 <http://doi.org/10.1093/cercor/bhu203>

- 719 Coggan, D. D., Baker, D. H. & Andrews, T. J. (2016). The role of visual and semantic  
720 properties in the emergence of category-specific patterns of neural response in the  
721 human brain. *eNeuro*, 3(4), e0158-16.2016. [http://doi.org/10.1523/eneuro.0158-](http://doi.org/10.1523/eneuro.0158-16.2016)  
722 16.2016
- 723 Fechner, G. T. (1912). The classical psychologists: Selections illustrating psychology from  
724 Anaxagoras to Wundt. In B. Rand (Ed.), *Elements of psychophysics* (pp. 562–572).  
725 Boston: Houghton Mifflin.
- 726 Georgeson, M. A., & Meese, T. S. (2006). Fixed or variable noise in contrast discrimination?  
727 The jury's still out.. *Vision Research*, 46(25), 4294–4303.  
728 <http://doi.org/10.1016/j.visres.2005.08.024>
- 729 Graham, N. V. (2011). Beyond multiple pattern analyzers modeled as linear filters (as  
730 classical V1 simple cells): useful additions of the last 25 years. *Vision Research*, 51(13),  
731 1397–1430. <http://doi.org/10.1016/j.visres.2011.02.007>
- 732 Grill-spector, K., Henson, R., & Martin, A. (2006). Repetition and the brain : neural models of  
733 stimulus-specific effects, *10*(1), 17–19. <http://doi.org/10.1016/j.tics.2005.11.006>
- 734 Hecht, S., & Wald, G. (1934). The visual acuity and intensity discrimination of drosophila.  
735 *The Journal of General Physiology*, 17(4), 517–547.
- 736 Hesselmann, G., Kell, C. A., Eger, E., & Kleinschmidt, A. (2008). Spontaneous local variations  
737 in ongoing neural activity bias perceptual decisions. *Proceedings of the National*  
738 *Academy of Sciences of the United States of America*, 105(31), 10984–10989.  
739 <http://doi.org/10.1073/pnas.0712043105>
- 740 Hillyard, S. A., Squires, K. C., Bauer, J. W., & Lindsay, P. H. (1971). Evoked potential  
741 correlates of auditory signal detection. *Science (New York, N.Y.)*, 172(3990), 1357–  
742 1360.
- 743 Jolij, J., Meurs, M., & Haitel, E. (2011). Why do we see what's not there? *Communicative &*  
744 *Integrative Biology*, 4(6), 764–767.
- 745 King, J., & Dehaene, S. (2014). Characterizing the dynamics of mental representations : the  
746 temporal generalization method, 18(4), 203–210.  
747 <http://doi.org/10.1016/j.tics.2014.01.002.Characterizing>
- 748 Kingdom, F. A. A. (2016). Fixed versus variable internal noise in contrast transduction: The  
749 significance of Whittle's data. *Vision Research*, 128, 1–5.  
750 <http://doi.org/10.1016/j.visres.2016.09.004>
- 751 Klein, A., Ghosh, S. S., Bao, F. S., Giard, J., Häme, Y., Stavsky, E., ... Keshavan, A. (2017).  
752 Mindboggling morphometry of human brains. *PLOS Computational Biology*, 13(2),  
753 e1005350. <http://doi.org/10.1371/journal.pcbi.1005350>
- 754 Klein, S. A., & Levi, D. M. (2009). Stochastic model for detection of signals in noise. *Journal of*  
755 *Optical Society of America*, 26(11), 110–126.
- 756 Kleiner, M., Brainard, D. H., & Pelli, D. G. (2007). What's new in Psychtoolbox-3? *Perception*,  
757 36(S), 14.
- 758 Kontsevich, L. L., Chen, C.-C., & Tyler, C. W. (2002). Separating the effects of response  
759 nonlinearity and internal noise psychophysically. *Vision Research*, 42(14), 1771–1784.
- 760 Legge, G. E., & Foley, J. M. (1980). Contrast masking in human vision. *Journal of the Optical*  
761 *Society of America*, 70(12), 1458–1471. <http://doi.org/10.1364/JOSA.70.001458>
- 762 Maris, E., & Oostenveld, R. (2007). Nonparametric statistical testing of EEG- and MEG-data.  
763 *Journal of Neuroscience Methods*, 164(1), 177–190.  
764 <http://doi.org/10.1016/j.jneumeth.2007.03.024>
- 765 Michelson, C. A., Pillow, J. W., & Seidemann, E. (2017). Majority of choice-related variability

766 in perceptual decisions is present in early sensory cortex. *Preprint*.  
767 Mostert, P., Kok, P., & de Lange, F. P. (2016). Dissociating sensory from decision processes in  
768 human perceptual decision making. *Scientific Reports*, 5(1).  
769 <http://doi.org/10.1038/srep18253>  
770 Mueller, S. T., & Weidemann, C. T. (2008). Decision noise: An explanation for observed  
771 violations of signal detection theory. *Psychonomic Bulletin & Review*, 15(3), 465–494.  
772 <http://doi.org/10.3758/PBR.15.3.465>  
773 Oostenveld, R., Fries, P., Maris, E., & Schoffelen, J.-M. (2011). FieldTrip: Open Source  
774 Software for Advanced Analysis of MEG, EEG, and Invasive Electrophysiological Data.  
775 *Computational Intelligence and Neuroscience*, 2011, 1–9.  
776 <http://doi.org/10.1155/2011/156869>  
777 Peirce, J. W. (2007). PsychoPy—Psychophysics software in Python. *Journal of Neuroscience*  
778 *Methods*, 162(1–2), 8–13. <http://doi.org/10.1016/j.jneumeth.2006.11.017>  
779 Pelli, D. G. (1985). Uncertainty explains many aspects of visual contrast detection and  
780 discrimination. *Journal of the Optical Society of America. A, Optics and Image Science*,  
781 2(9), 1508–1532. <http://doi.org/10.1364/JOSAA.2.001508>  
782 Pelli, D. G. (1997). The VideoToolbox software for visual psychophysics: Transforming  
783 numbers into movies. *Spatial Vision*, 10(437–442).  
784 Ress, D., & Heeger, D. J. (2003). Neuronal correlates of perception in early visual cortex.  
785 *Nature Neuroscience*, 6(4), 414–420. <http://doi.org/10.1038/nn1024>  
786 Roelfsema, P. R., & Spekreijse, H. (2001). The representation of erroneously perceived  
787 stimuli in the primary visual cortex. *Neuron*, 31(5), 853–863.  
788 [http://doi.org/10.1016/S0896-6273\(01\)00408-1](http://doi.org/10.1016/S0896-6273(01)00408-1)  
789 Rolls, E. T., & Baylis, G. C. (1986). Size and contrast have only small effects on the responses  
790 to faces of neurons in the cortex of the superior temporal sulcus of the monkey.  
791 *Experimental Brain Research*, 65(1), 38–48.  
792 Schölvinck, M. L., Friston, K. J., & Rees, G. (2012). The influence of spontaneous activity on  
793 stimulus processing in primary visual cortex. *NeuroImage*, 59, 2700–2708.  
794 <http://doi.org/10.1016/j.neuroimage.2011.10.066>  
795 Smith, R. A., & Swift, D. J. (1985). Spatial-frequency masking and Birdsall’s theorem. *Journal*  
796 *of the Optical Society of America. A, Optics and Image Science*, 2(9), 1593–1599.  
797 Squires, N. K., Squires, K. C., & Hillyard, S. A. (1975). Two varieties of long-latency positive  
798 waves evoked by unpredictable auditory stimuli in man. *Electroencephalography and*  
799 *Clinical Neurophysiology*, 38(4), 387–401.  
800 Tadel, F., Baillet, S., Mosher, J. C., Pantazis, D., & Leahy, R. M. (2011). Brainstorm: A User-  
801 Friendly Application for MEG/EEG Analysis. *Computational Intelligence and*  
802 *Neuroscience*, 2011, 1–13. <http://doi.org/10.1155/2011/879716>  
803 Tolhurst, D. J., Movshon, J. A., & Dean, A. F. (1983). The statistical reliability of signals in  
804 single neurons in cat and monkey visual cortex. *Vision Research*, 23(8), 775–785.  
805 Woldorff, M. (1993). Distortion of ERP averages due to overlap from temporally adjacent  
806 ERPs: Analysis and correction. *Psychophysiology*, 30, 98–119.  
807  
808

809 **6 Appendices**

810

811 Table A1: Numbers of vertices on the cortical mesh. Individual regions were taken from a mesh consisting of  
 812 around 3000 vertices, and pooled across hemispheres. The ‘whole brain’ mesh (final row) was subsampled to  
 813 around 500 vertices. Precise numbers of vertices varied across individual participants owing to individual  
 814 differences in brain size and morphology. Entries in the ‘Colour’ column correspond to the colours used in  
 815 Figures 6, A2 & A3.

| Region                     | Colour | Mean size | Minimum size | Maximum size |
|----------------------------|--------|-----------|--------------|--------------|
| Rostral Middle Frontal     |        | 157       | 145          | 173          |
| Superior Frontal           |        | 342       | 317          | 384          |
| Rostral Anterior Cingulate |        | 31        | 27           | 37           |
| Lateral Orbitofrontal      |        | 100       | 83           | 113          |
| Medial Orbitofrontal       |        | 53        | 45           | 62           |
| Pars Triangularis          |        | 63        | 56           | 69           |
| Pars Orbitalis             |        | 31        | 27           | 35           |
| Caudal Anterior Cingulate  |        | 29        | 25           | 34           |
| Pars Opercularis           |        | 53        | 43           | 61           |
| Caudal Middle Frontal      |        | 75        | 59           | 91           |
| Insula                     |        | 60        | 53           | 69           |
| Entorhinal                 |        | 16        | 9            | 25           |
| Pre-central                |        | 140       | 124          | 155          |
| Superior Temporal          |        | 166       | 150          | 183          |
| Posterior Cingulate        |        | 38        | 32           | 45           |
| Transverse Temporal        |        | 9         | 6            | 11           |
| Post-central               |        | 142       | 130          | 156          |
| Para-central               |        | 48        | 41           | 61           |
| Middle Temporal            |        | 134       | 123          | 152          |
| Parahippocampal            |        | 21        | 17           | 25           |
| Inferior Temporal          |        | 118       | 96           | 149          |
| Supramarginal              |        | 123       | 102          | 155          |
| Isthmus Cingulate          |        | 28        | 23           | 34           |
| Fusiform                   |        | 81        | 73           | 87           |
| Precuneous                 |        | 119       | 93           | 140          |
| Superior Parietal          |        | 148       | 136          | 168          |
| Inferior Parietal          |        | 149       | 131          | 157          |
| Lingual                    |        | 101       | 69           | 125          |
| Cuneus                     |        | 67        | 58           | 74           |
| Peri-calcarine             |        | 38        | 24           | 45           |
| Lateral Occipital          |        | 162       | 139          | 181          |
| Whole brain                |        | 503       | 503          | 504          |

816

817

818

819

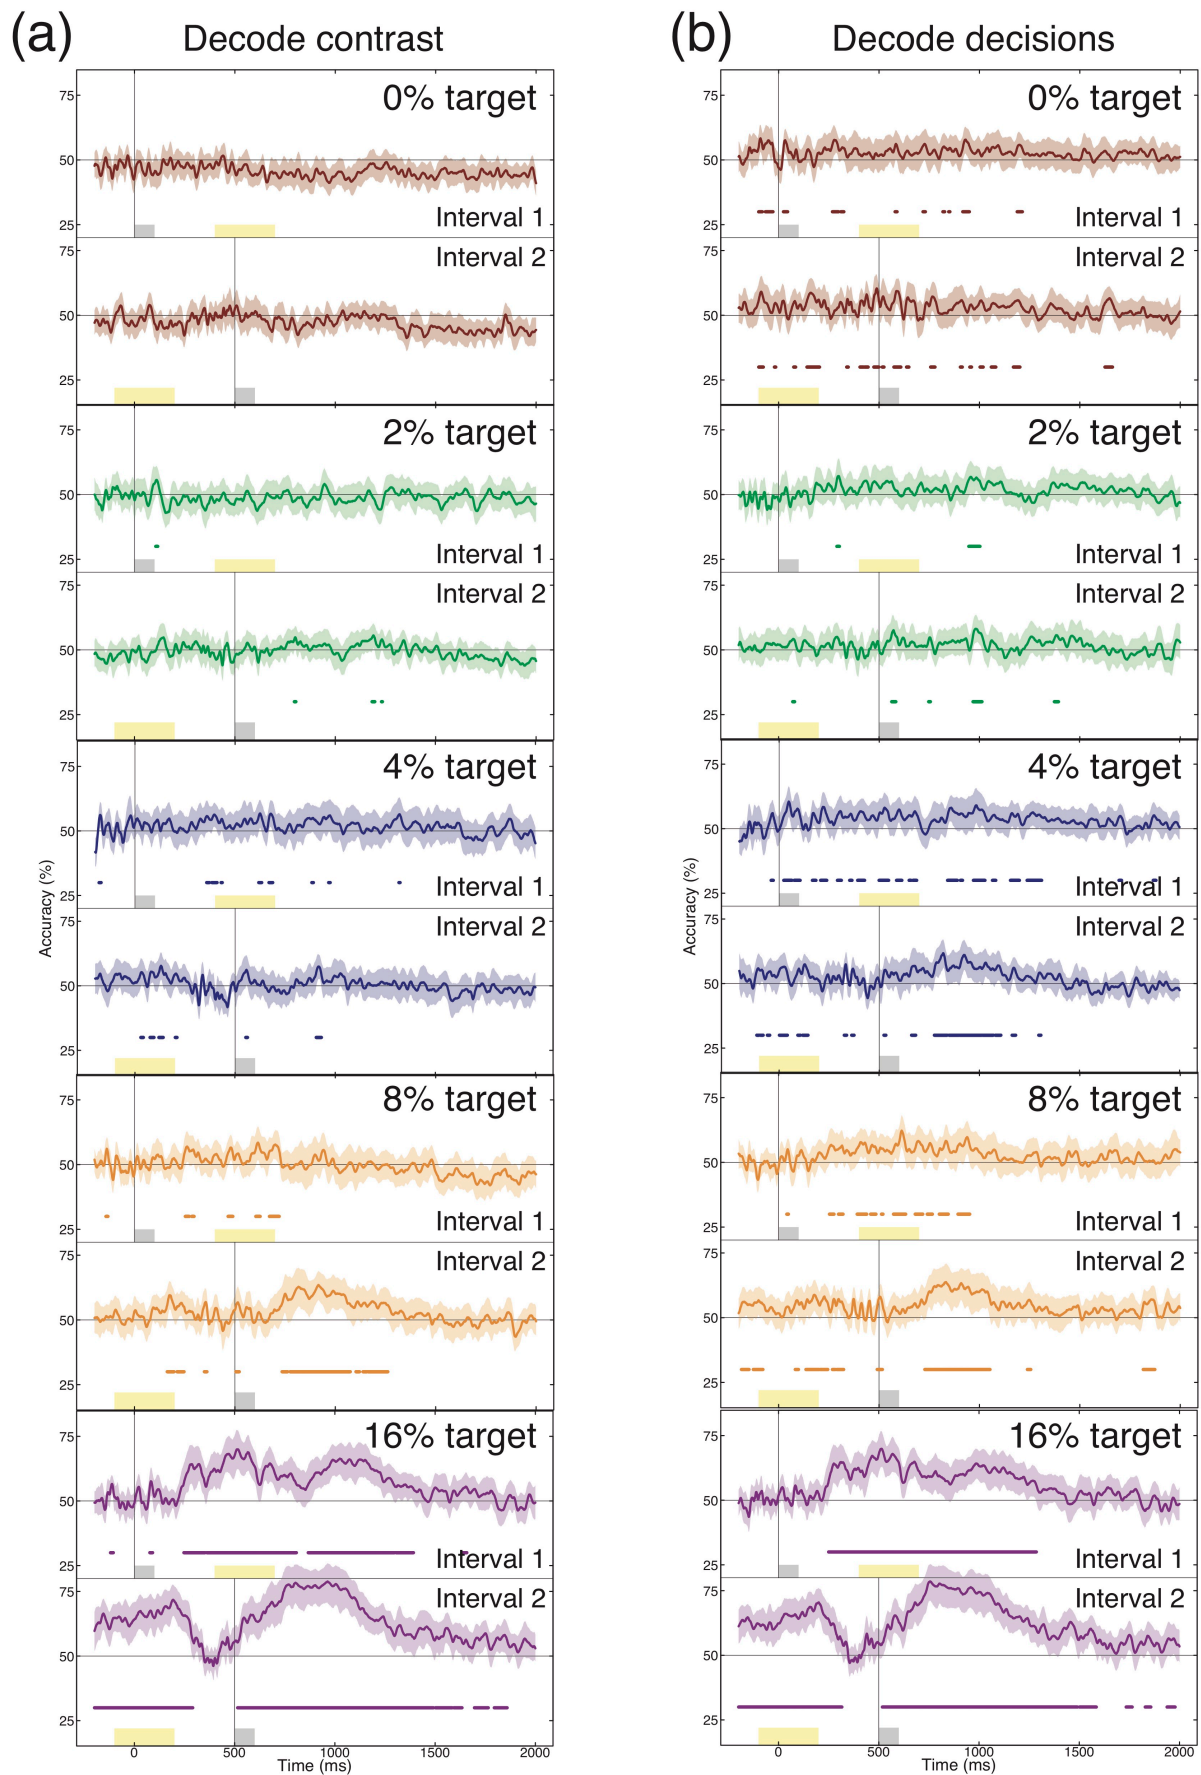

820  
821  
822

Figure A1: Interval-based MVPA analysis for all target contrast conditions, and for both contrast-based decoding (a) and decision-based decoding (b). Plotting conventions are consistent with Figure 4b,c.

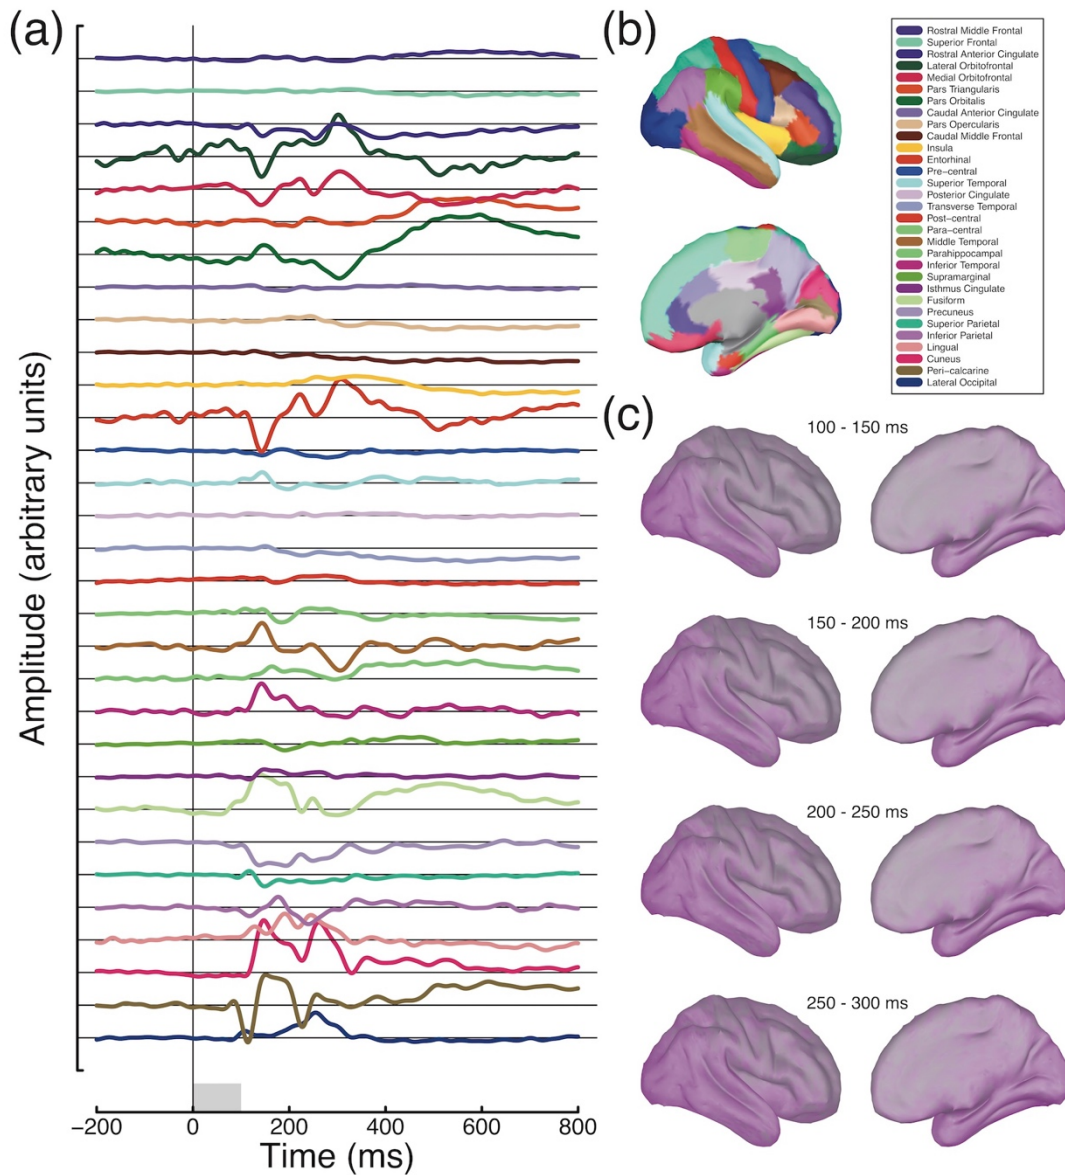

823  
824  
825  
826  
827  
828

Figure A2: Maximal evoked responses in different anatomical regions. Each trace in panel (a) plots the timecourse of the vertex in the named region (see legend in panel (b)) with the largest absolute deflection from baseline. Panel (c) shows absolute activity averaged across four time windows, demonstrating that the majority of activity occurs in occipito-temporal regions.



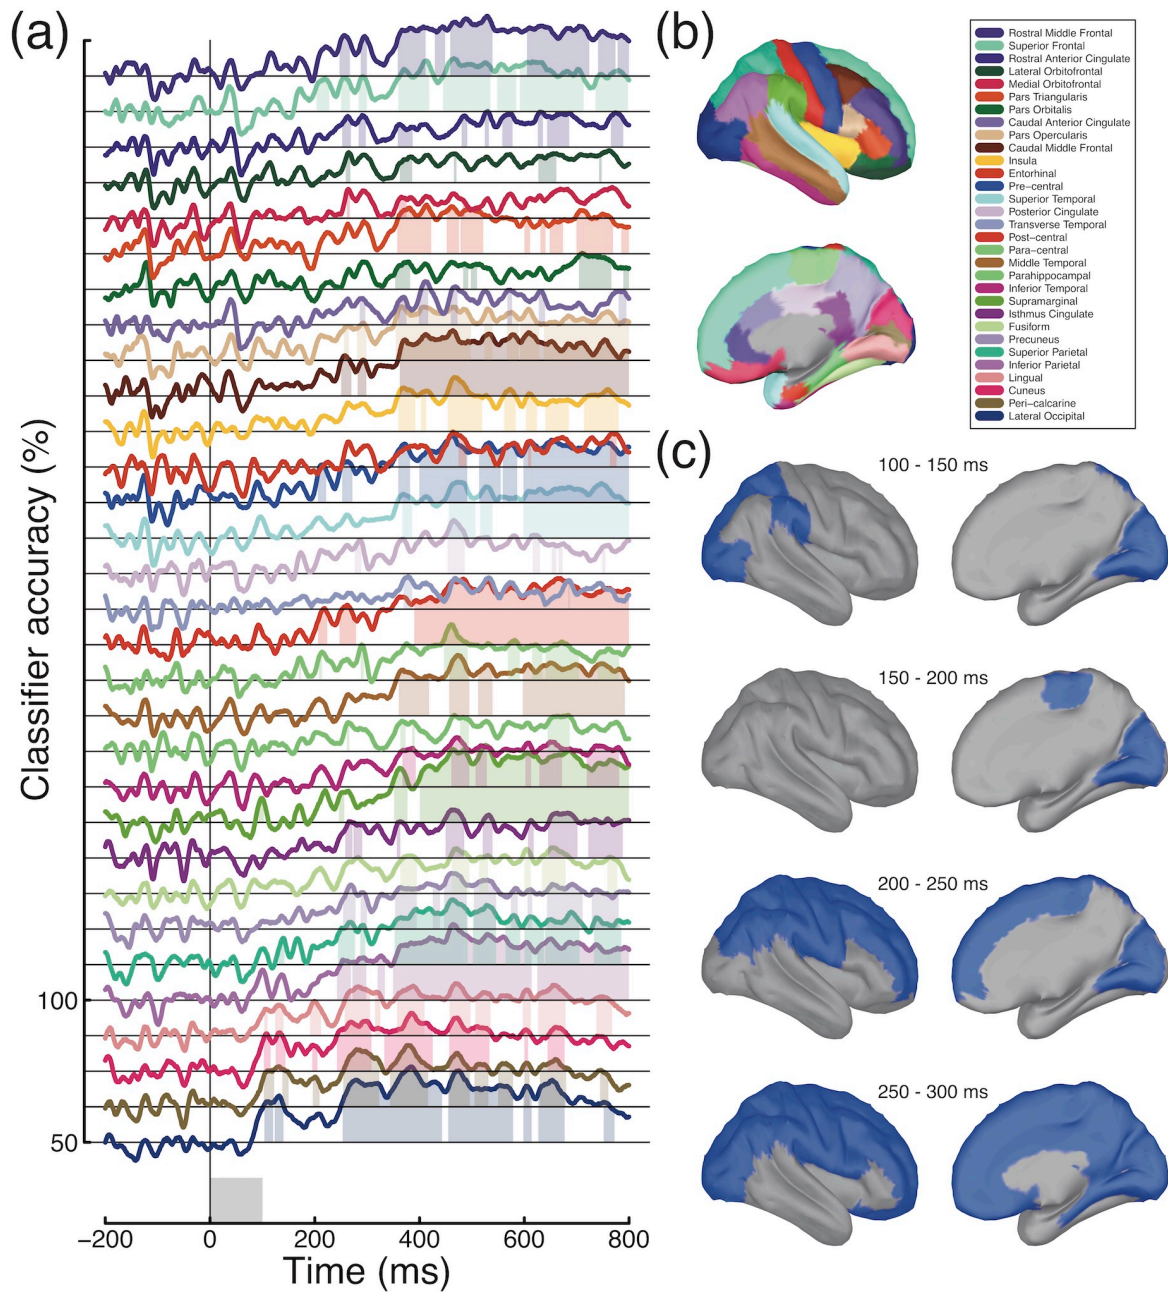

829  
830  
831  
832

Figure A3: Atlas-based classification of decisions in the 16% target condition. Plotting conventions mirror those of Figure 6.
